# Supplementary material for: Potentilloside A, a New Flavonol-bis-Glucuronide from the Leaves of Potentilla chinensis, Inhibits TNF-α-Induced ROS Generation and MMP-1 Secretion
Source: MDPI journal article supplement (doi:10.3390/plants11233318), 2022-12-01

## Supporting information

**Potentilloside A, a New Flavonol-*bis*-glucuronide from the Leaves of *Potentilla chinensis*, Inhibits TNF- $\alpha$ -Induced ROS Generation and MMP-1 Secretion**

## Contents of supporting information

**Figure S1.** HR-ESI-Orbitrap-MS spectrum of compound **1**.

**Figure S2.** The IR spectrum of compound **1**.

**Figure S3.** The  $^1\text{H}$ -NMR spectrum of compound **1** (500 MHz,  $\text{DMSO-}d_6$ ).

**Figure S4.** The  $^{13}\text{C}$ -NMR spectrum of compound **1** (125 MHz,  $\text{DMSO-}d_6$ ).

**Figure S5.** The HSQC spectrum of compound **1**.

**Figure S6.** The COSY spectrum of compound **1**.

**Figure S7.** The HMBC spectrum of compound **1**.

**Figure S8.** The ROESY spectrum of compound **1**.

**Figure S1.** HR-ESI-Orbitrap-MS spectrum of compound **1**.

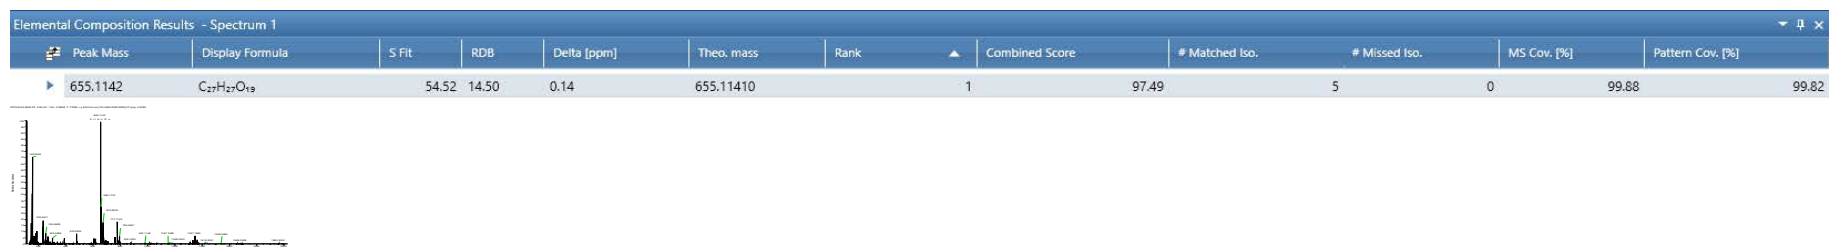

**Figure S2.** The IR spectrum of compound 1.

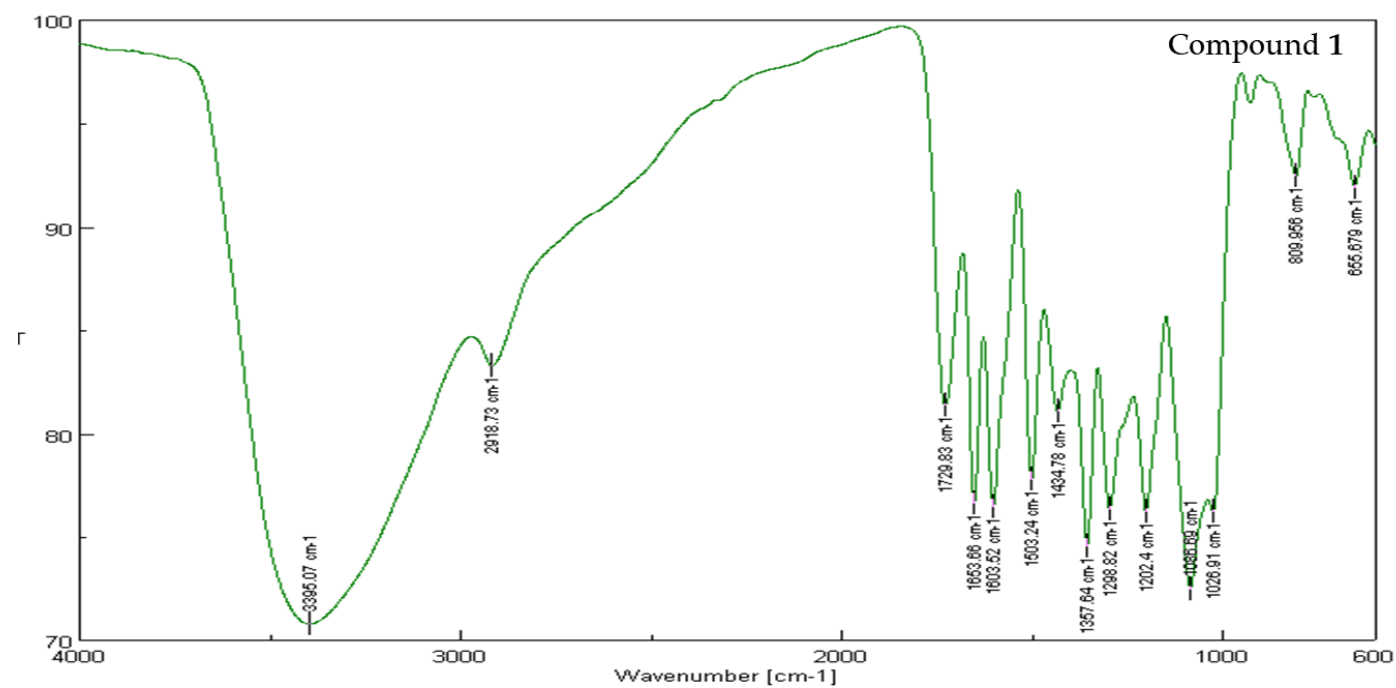

**Figure S3.** The  $^1\text{H}$ -NMR spectrum of compound **1** (500 MHz,  $\text{DMSO}-d_6$ ).

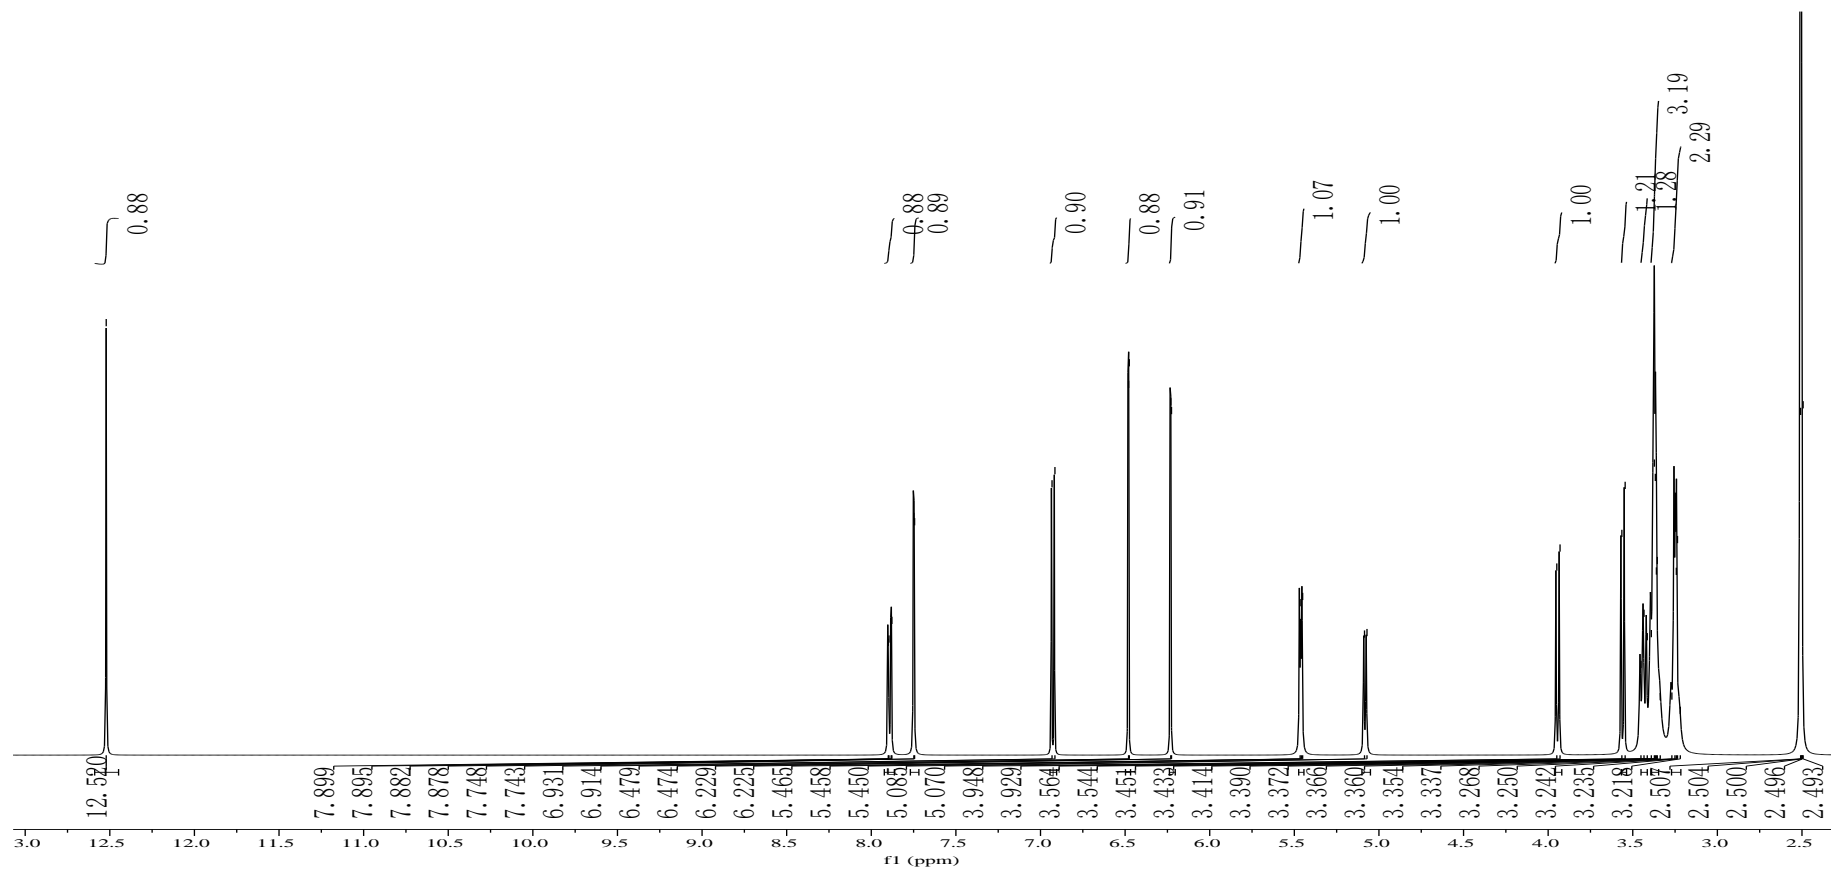

**Figure S4.** The  $^{13}\text{C}$ -NMR spectrum of compound **1** (125 MHz,  $\text{DMSO-}d_6$ ).

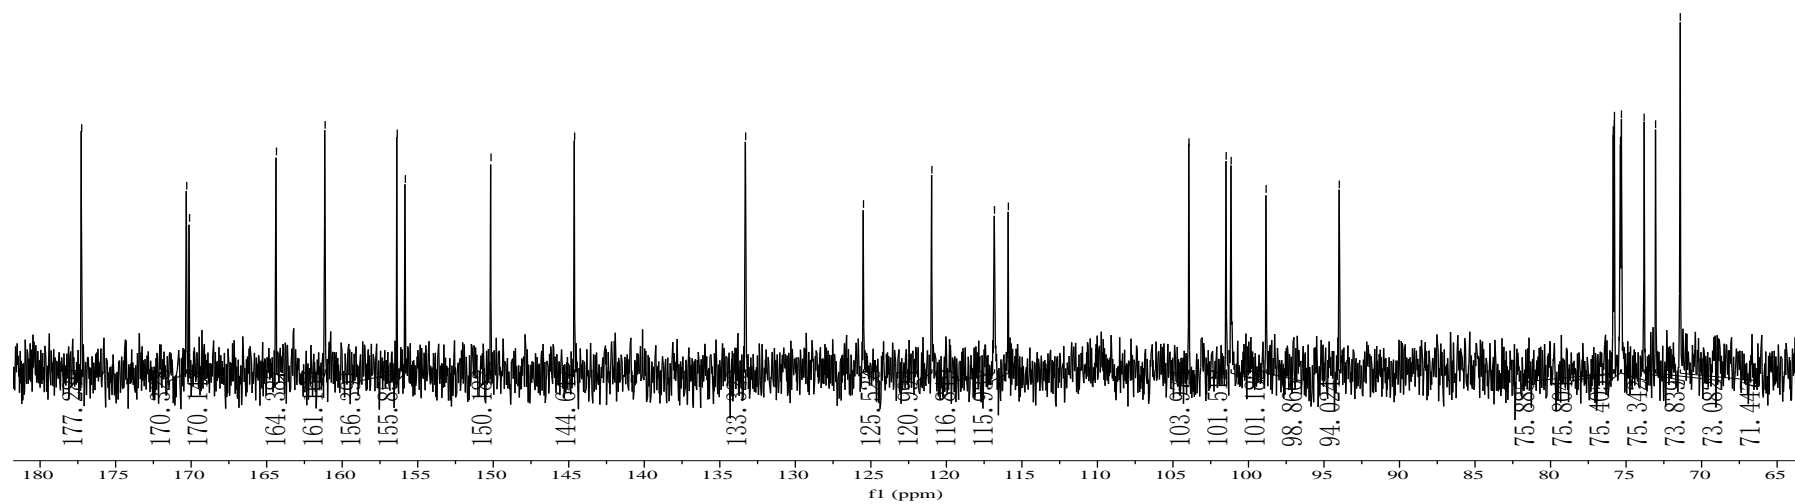

**Figure S5.** The HSQC spectrum of compound **1**.

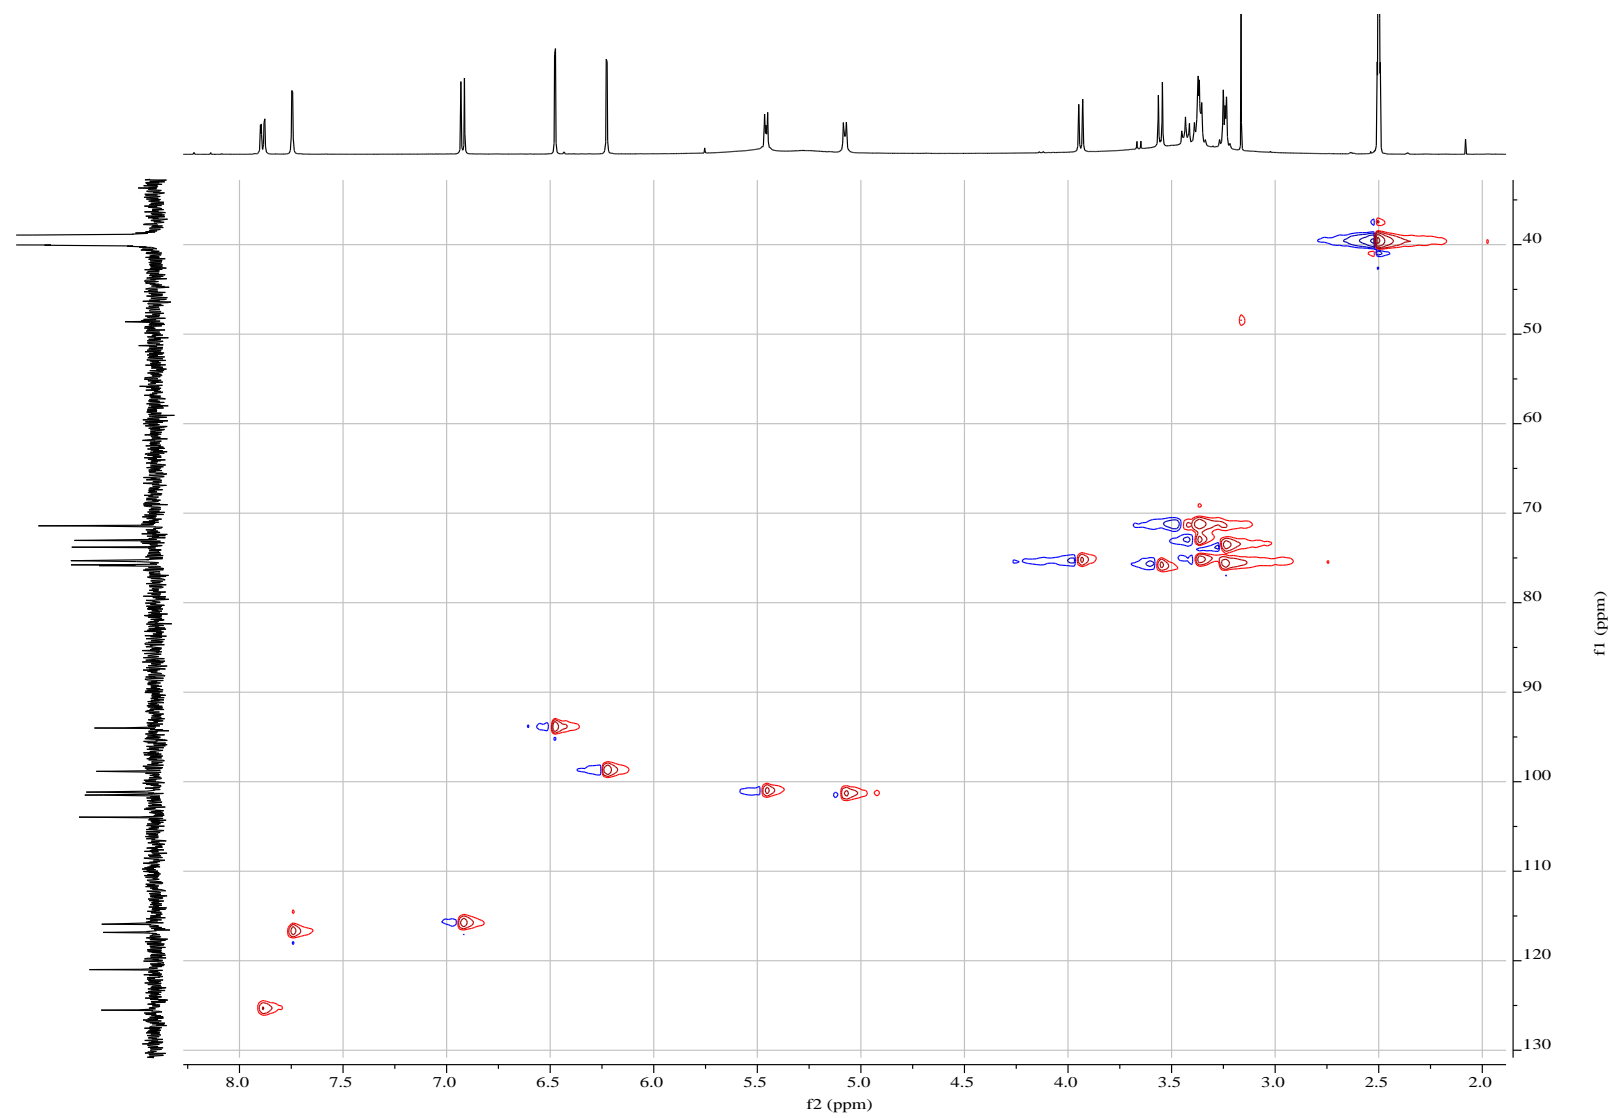

**Figure S6.** The COSY spectrum of compound **1**.

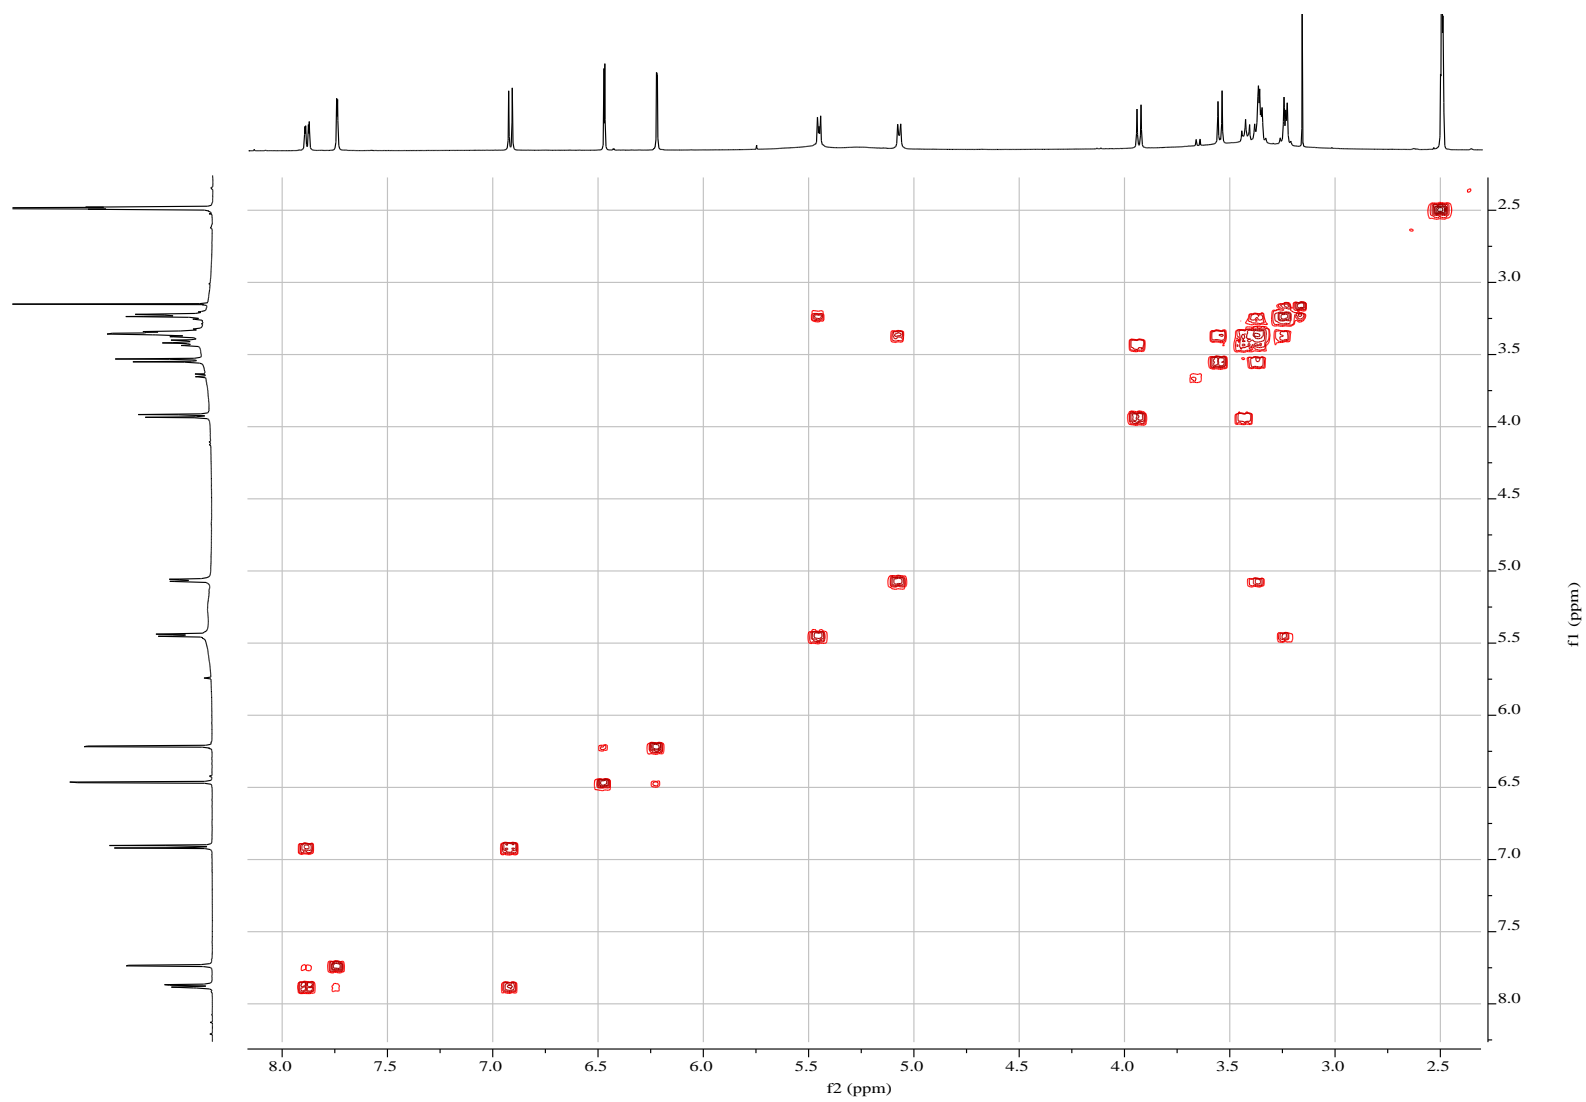



**Figure S7.** The HMBC spectrum of compound **1**.

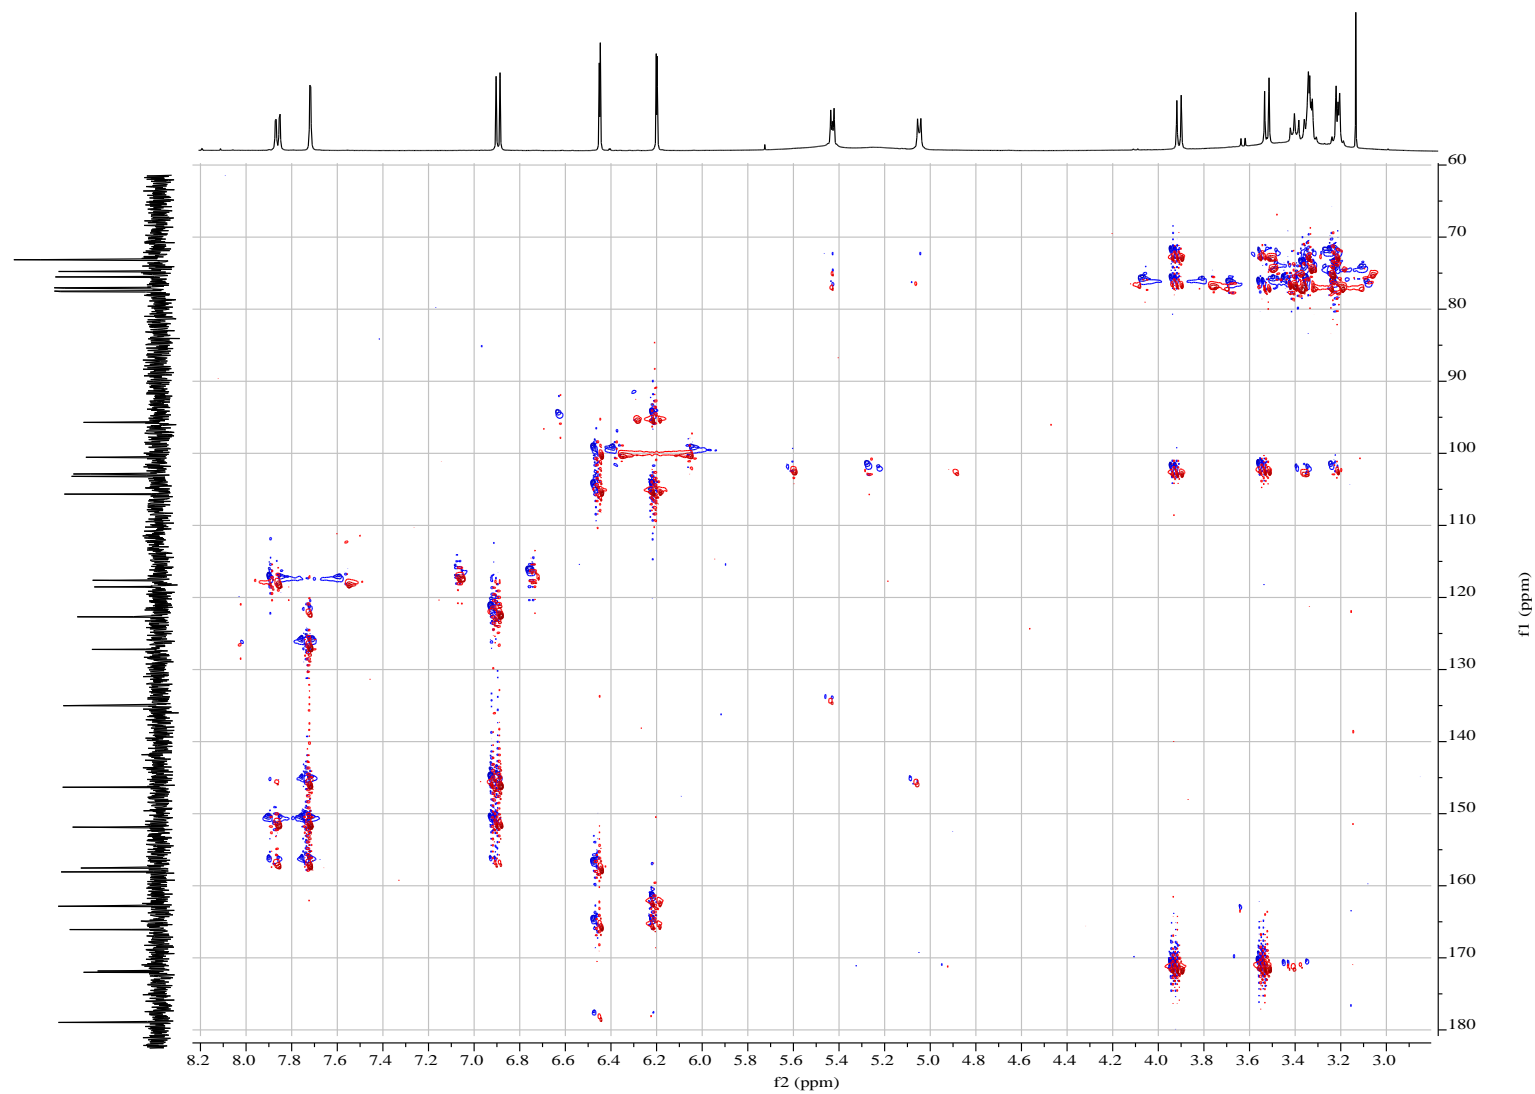

**Figure S8.** The ROESY spectrum of compound **1**.

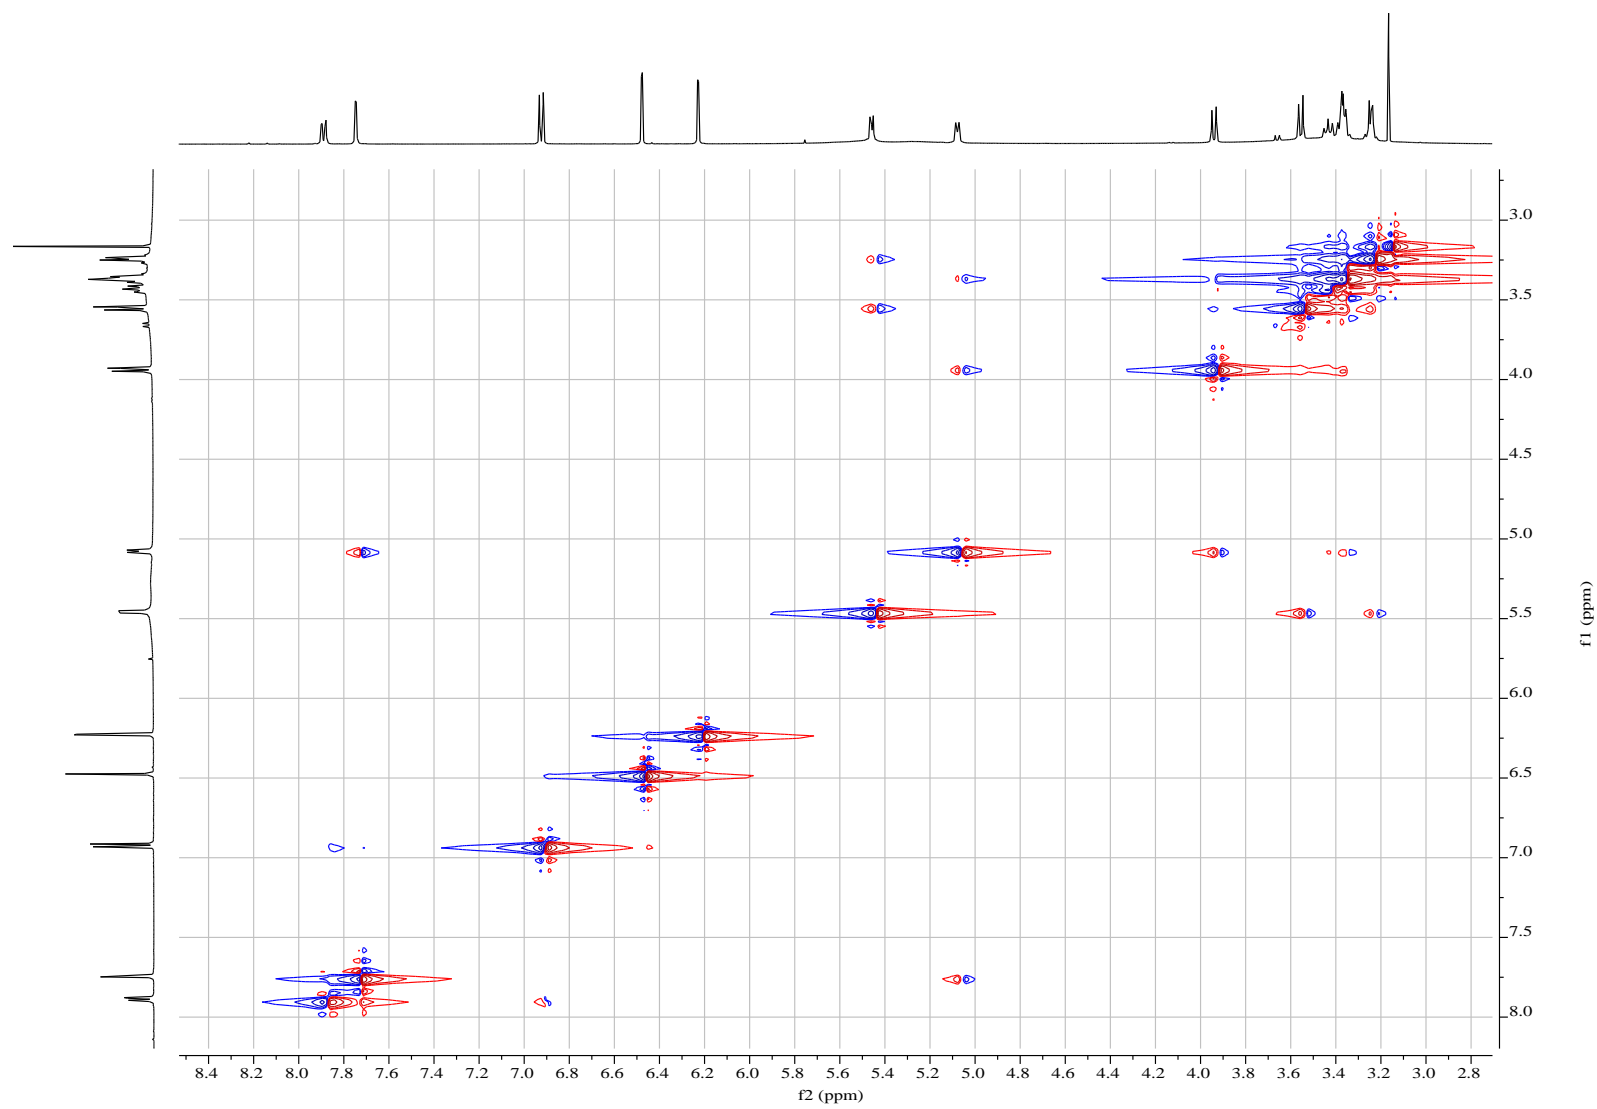

Supplement: s1 [file s1]
